# Supplementary material for: Diazo chemistry controlling the selectivity of olefin ketonisation by nitrous oxide
Source: Royal Society of Chemistry journal article supplement (doi:10.1039/b704351a), 2007-01-01
Supplement: b704351a.pdf [file b704351a.pdf]

## Diazo Chemistry Controlling the Selectivity of Olefin Ketonization by Nitrous Oxide

*Ive Hermans\*, Bart Moens, Jozef Peeters, Pierre Jacobs, Bert Sels\**

### SUPPORTING INFORMATION

#### GEOMETRIES AND VIBRATIONS OF RELEVANT STRUCTURES.

##### I. Cyclopentene system

Pre-reactive complex

----

E(RB+HF-LYP/6-311++G(d,p)) (Hartree): -380.100928178

Electronic state : 1-A

Cartesian coordinates (Angs):

|   |           |           |           |
|---|-----------|-----------|-----------|
| C | -0.922471 | -0.166220 | 1.206340  |
| C | -0.946568 | 1.058129  | 0.678315  |
| H | -0.469997 | -0.424128 | 2.157614  |
| H | -0.515193 | 1.941978  | 1.135312  |
| O | 2.273915  | -1.174951 | -0.372534 |
| N | 2.601090  | -0.055056 | -0.163900 |
| N | 2.914114  | 1.007514  | 0.033355  |
| C | -1.613341 | 1.078936  | -0.678794 |
| H | -2.335249 | 1.894944  | -0.783232 |
| H | -0.867416 | 1.225956  | -1.471549 |
| C | -1.565555 | -1.191338 | 0.300224  |
| H | -2.257175 | -1.852776 | 0.831287  |
| H | -0.799320 | -1.837426 | -0.146879 |
| C | -2.282609 | -0.319053 | -0.765193 |
| H | -2.228966 | -0.749752 | -1.766917 |
| H | -3.341168 | -0.229120 | -0.506896 |

Rotational constants (GHz): 3.3470800 0.9720400 0.8914900

Vibrational harmonic frequencies (cm-1):

|          |          |          |
|----------|----------|----------|
| -11.6922 | 13.8489  | 30.7003  |
| 33.0382  | 45.9786  | 137.9030 |
| 393.9608 | 577.9459 | 580.1713 |
| 617.6758 | 714.7938 | 783.0129 |
| 817.8573 | 889.9131 | 901.0690 |

|           |           |           |
|-----------|-----------|-----------|
| 915.6060  | 971.5482  | 973.5859  |
| 1034.4297 | 1068.0635 | 1128.1584 |
| 1154.6430 | 1223.6630 | 1230.4670 |
| 1307.6201 | 1316.9455 | 1325.7477 |
| 1327.6997 | 1377.1862 | 1484.2693 |
| 1490.3807 | 1509.2205 | 1669.4010 |
| 2345.5306 | 2995.0140 | 3006.9727 |
| 3035.5486 | 3045.2995 | 3055.2902 |
| 3090.2366 | 3165.0463 | 3189.7496 |

Zero-point correction (Hartree): 0.127521

TS<sup>add</sup>

-----

E(UB+HF-LYP/6-311++G(d,p)) (Hartree): -380.058016095

Electronic state : 1-A

Cartesian coordinates (Angs):

|   |           |           |           |
|---|-----------|-----------|-----------|
| C | -0.180189 | 0.683690  | 0.928707  |
| C | -0.185082 | -0.711004 | 0.895673  |
| C | -1.310194 | -1.194537 | -0.007257 |
| C | -1.236606 | 1.243888  | 0.008589  |
| C | -1.603432 | 0.039945  | -0.888953 |
| H | 0.250554  | 1.264381  | 1.732940  |
| H | 0.159503  | -1.303622 | 1.734091  |
| H | -2.182133 | -1.451448 | 0.607893  |
| H | -1.045817 | -2.083585 | -0.583003 |
| H | -0.908410 | 2.124470  | -0.546520 |
| H | -2.098335 | 1.551408  | 0.618411  |
| H | -2.635139 | 0.074047  | -1.242775 |
| H | -0.953671 | 0.027560  | -1.768755 |
| O | 1.615237  | 1.053785  | -0.208001 |
| N | 1.913163  | -0.118882 | -0.452699 |
| N | 1.456060  | -1.167600 | -0.191420 |

Rotational constants (GHz): 3.4417300 1.9636200 1.6145900

Vibrational harmonic frequencies (cm-1):

|           |           |           |
|-----------|-----------|-----------|
| -448.2327 | 110.5724  | 149.5595  |
| 224.8475  | 265.7118  | 310.0787  |
| 500.2777  | 567.3902  | 619.6552  |
| 709.2114  | 783.8796  | 834.0183  |
| 864.7152  | 877.7527  | 914.4600  |
| 926.0923  | 959.9603  | 1017.3795 |
| 1031.9363 | 1054.0848 | 1114.9423 |
| 1147.9467 | 1207.7318 | 1233.7309 |
| 1247.8503 | 1309.6247 | 1317.9996 |
| 1325.1792 | 1372.7845 | 1463.0296 |
| 1479.5750 | 1495.3280 | 1508.4930 |

Supplementary Material for PCCP  
This journal is © The Owner Societies 2007

|           |           |           |
|-----------|-----------|-----------|
| 1893.0653 | 2990.8611 | 3008.5251 |
| 3047.4826 | 3083.1213 | 3085.6365 |
| 3098.1184 | 3182.5459 | 3212.7047 |

Zero-point correction (Hartree): 0.128826

OD

----

E(RB+HF-LYP/6-311++G(d,p)) (Hartree): -380.110040025

Electronic state : 1-A

Cartesian coordinates (Angs):

|   |           |           |           |
|---|-----------|-----------|-----------|
| C | 0.129924  | 0.783785  | 0.704861  |
| C | -1.201806 | 1.200593  | 0.063619  |
| O | 1.253717  | 1.097459  | -0.154538 |
| N | 1.837206  | -0.121517 | -0.604603 |
| C | -1.635872 | -0.023729 | -0.762668 |
| C | -1.202357 | -1.216500 | 0.108173  |
| C | 0.135090  | -0.763118 | 0.728505  |
| N | 1.280246  | -1.108347 | -0.151348 |
| H | 0.323081  | 1.256209  | 1.668380  |
| H | -1.091836 | 2.115290  | -0.520928 |
| H | -1.930252 | 1.397446  | 0.858175  |
| H | -2.705428 | -0.029789 | -0.981493 |
| H | -1.105788 | -0.040824 | -1.719730 |
| H | -1.092791 | -2.152093 | -0.442421 |
| H | -1.927443 | -1.384371 | 0.910763  |
| H | 0.328675  | -1.218679 | 1.700268  |

Rotational constants (GHz): 3.6302400 2.3227700 1.7865100

Vibrational harmonic frequencies (cm-1):

|           |           |           |
|-----------|-----------|-----------|
| 99.3825   | 192.8504  | 331.1597  |
| 386.5797  | 533.0257  | 586.5951  |
| 632.1567  | 664.1602  | 786.5998  |
| 797.2327  | 857.8438  | 867.7768  |
| 890.2402  | 922.7935  | 940.5680  |
| 961.5306  | 988.3873  | 1030.3051 |
| 1047.9906 | 1106.0494 | 1162.2932 |
| 1189.8594 | 1223.3351 | 1276.2871 |
| 1299.0439 | 1302.2875 | 1323.7276 |
| 1337.2306 | 1356.5266 | 1362.9681 |
| 1476.5111 | 1487.6873 | 1504.0436 |
| 1657.9723 | 3029.8233 | 3038.8865 |
| 3046.2166 | 3085.2803 | 3091.6179 |
| 3098.9673 | 3101.5026 | 3105.4453 |

Zero-point correction (Hartree): 0.132545

TS<sup>diazo</sup>

-----

E(UB+HF-LYP/6-311++G(d,p)) (Hartree): -380.082151450

Electronic state : 1-A

Cartesian coordinates (Angs):

|   |           |           |           |
|---|-----------|-----------|-----------|
| C | 0.038123  | 1.084032  | 0.586713  |
| C | 0.230764  | -0.819778 | 0.771807  |
| O | 0.993579  | 1.521914  | -0.139579 |
| N | 1.365758  | -0.953348 | -0.020465 |
| N | 2.071571  | -0.338520 | -0.662351 |
| H | 0.077106  | 1.341243  | 1.662934  |
| H | 0.457010  | -1.134290 | 1.788808  |
| C | -1.056019 | -1.363278 | 0.153608  |
| H | -1.758559 | -1.536110 | 0.973803  |
| H | -0.908393 | -2.321674 | -0.349699 |
| C | -1.393116 | 1.050459  | -0.003744 |
| H | -2.121966 | 1.110517  | 0.814042  |
| H | -1.524071 | 1.927975  | -0.639372 |
| C | -1.586205 | -0.259576 | -0.775021 |
| H | -2.628264 | -0.437739 | -1.052469 |
| H | -1.004077 | -0.233309 | -1.701888 |

Rotational constants (GHz): 3.0931300 2.2442400 1.6101400

Vibrational harmonic frequencies (cm-1):

|           |           |           |
|-----------|-----------|-----------|
| -415.6828 | 83.8232   | 184.5550  |
| 282.9839  | 288.8080  | 399.6542  |
| 478.6202  | 507.5276  | 586.0401  |
| 601.6356  | 714.9173  | 793.4974  |
| 808.0559  | 875.1593  | 918.7978  |
| 934.8821  | 962.8916  | 1020.2018 |
| 1056.1008 | 1086.2876 | 1105.4809 |
| 1169.4816 | 1207.2293 | 1264.6333 |
| 1306.7928 | 1328.3742 | 1338.9338 |
| 1346.1514 | 1361.4134 | 1443.1830 |
| 1476.2936 | 1485.5151 | 1500.9603 |
| 2122.9766 | 2880.1439 | 3015.1148 |
| 3037.3831 | 3046.4952 | 3079.0896 |
| 3090.7230 | 3098.2007 | 3135.0594 |

Zero-point correction (Hartree): 0.128543

TS<sup>H-shift</sup>

-----

E(UB+HF-LYP/6-311++G(d,p)) (Hartree): -380.078374076

Electronic state : 1-A

Cartesian coordinates (Angs):

|   |           |           |           |
|---|-----------|-----------|-----------|
| C | 0.128849  | 0.795988  | 0.492773  |
| C | -0.909119 | 1.093972  | -0.622654 |
| O | 1.335490  | 1.304355  | 0.460888  |
| N | 2.143852  | -0.388271 | -0.631145 |
| C | -2.050974 | 0.105138  | -0.345619 |
| C | -1.357577 | -1.166862 | 0.228596  |
| C | -0.035532 | -0.681457 | 0.747214  |
| N | 1.394639  | -1.195089 | -0.398344 |
| H | -0.375709 | 1.043063  | 1.484457  |
| H | -0.432278 | 0.906094  | -1.589912 |
| H | -1.222165 | 2.138187  | -0.605109 |
| H | -2.731588 | 0.515744  | 0.406445  |
| H | -2.647262 | -0.126267 | -1.229106 |
| H | -1.168287 | -1.896458 | -0.565492 |
| H | -1.947605 | -1.684511 | 0.988820  |
| H | 0.417651  | -1.127844 | 1.627361  |

Rotational constants (GHz): 3.4566400 1.9294800 1.5229700

Vibrational harmonic frequencies (cm-1):

|           |           |           |
|-----------|-----------|-----------|
| -411.3053 | 121.1333  | 196.1133  |
| 229.0841  | 263.4242  | 373.3941  |
| 426.3740  | 499.3442  | 576.5233  |
| 625.6234  | 639.7243  | 763.5233  |
| 810.8225  | 874.5906  | 893.7219  |
| 903.1172  | 959.3706  | 1024.2726 |
| 1040.0545 | 1073.7314 | 1097.5927 |
| 1157.7444 | 1186.2521 | 1198.9520 |
| 1232.7867 | 1267.8233 | 1294.2675 |
| 1312.9256 | 1341.5137 | 1366.9803 |
| 1467.3327 | 1491.6396 | 1506.8543 |
| 2143.2868 | 2635.0064 | 3038.3210 |
| 3042.3114 | 3046.4884 | 3076.1108 |
| 3097.3061 | 3110.6762 | 3170.1605 |

Zero-point correction (Hartree): 0.126612

#### 5-diazopentanal

-----

E(RB+HF-LYP/6-311++G(d,p)) (Hartree): -380.110389612

Electronic state : 1-A

Cartesian coordinates (Angs):

|   |           |           |           |
|---|-----------|-----------|-----------|
| C | 2.952343  | -0.014133 | -0.301591 |
| C | -2.077087 | 0.636050  | -0.355018 |
| O | 3.733818  | -0.882619 | -0.002234 |
| N | -2.965834 | -0.271421 | -0.104416 |
| N | -3.745137 | -1.069250 | 0.136747  |
| C | -0.801460 | 0.716670  | 0.441737  |

Supplementary Material for PCCP

This journal is © The Owner Societies 2007

|   |           |           |           |
|---|-----------|-----------|-----------|
| C | 1.732533  | 0.366479  | 0.499997  |
| C | 0.440534  | 0.220938  | -0.324489 |
| H | 3.098242  | 0.570401  | -1.237955 |
| H | -2.299752 | 1.289394  | -1.187509 |
| H | -0.916286 | 0.141241  | 1.365446  |
| H | -0.640431 | 1.757677  | 0.747214  |
| H | 1.701841  | -0.243807 | 1.406024  |
| H | 1.851121  | 1.417577  | 0.798821  |
| H | 0.532740  | 0.784634  | -1.260025 |
| H | 0.297598  | -0.827497 | -0.604273 |

Rotational constants (GHz): 7.1505400 0.6417400 0.6171100

Vibrational harmonic frequencies (cm-1):

|           |           |           |
|-----------|-----------|-----------|
| 27.7573   | 58.3593   | 88.1767   |
| 90.3309   | 179.3173  | 237.8087  |
| 322.8141  | 352.2936  | 482.5785  |
| 529.3906  | 539.1851  | 598.0414  |
| 744.1182  | 800.8427  | 896.9980  |
| 978.1013  | 978.8913  | 1030.1970 |
| 1084.9863 | 1133.7577 | 1190.7062 |
| 1216.7178 | 1252.0697 | 1289.0402 |
| 1323.3182 | 1340.1128 | 1378.8220 |
| 1415.5033 | 1436.0187 | 1466.7556 |
| 1475.9275 | 1499.9525 | 1801.4695 |
| 2160.2501 | 2858.8289 | 2999.7823 |
| 3009.2240 | 3020.9091 | 3052.2586 |
| 3070.3288 | 3088.6959 | 3203.1938 |

Zero-point correction (Hartree): 0.126903

## II. Cyclohexene

TS<sup>add</sup>(a)

-----

E(RB+HF-LYP/6-311++G(d,p)) (Hartree): -419.384148102

Electronic state : 1-A

Cartesian coordinates (Angs):

|   |           |           |           |
|---|-----------|-----------|-----------|
| C | -0.192197 | -0.653569 | 0.943012  |
| C | -0.173558 | 0.747544  | 0.889152  |
| C | 0.937514  | -1.474635 | 0.344004  |
| N | -1.672306 | -1.158653 | -0.265568 |
| C | 0.849164  | 1.517396  | 0.079915  |
| O | -1.937130 | 1.045314  | -0.311609 |
| C | 1.676619  | -0.722875 | -0.767739 |
| C | 2.082886  | 0.674703  | -0.287695 |
| N | -2.169791 | -0.139364 | -0.579787 |

Supplementary Material for PCCP

This journal is © The Owner Societies 2007

|   |           |           |           |
|---|-----------|-----------|-----------|
| H | -0.684218 | -1.094376 | 1.805051  |
| H | -0.707713 | 1.295592  | 1.654715  |
| H | 0.545684  | -2.426999 | -0.021767 |
| H | 1.643866  | -1.717917 | 1.148603  |
| H | 1.147842  | 2.406585  | 0.643891  |
| H | 0.375333  | 1.891076  | -0.833491 |
| H | 2.557335  | -1.293524 | -1.076592 |
| H | 1.031038  | -0.638485 | -1.650029 |
| H | 2.665573  | 1.195710  | -1.052808 |
| H | 2.734404  | 0.574564  | 0.588891  |

Rotational constants (GHz): 2.6646700 1.4498900 1.1569400

Vibrational harmonic frequencies (cm-1):

|           |           |           |
|-----------|-----------|-----------|
| -455.9730 | 78.8378   | 102.3180  |
| 214.6376  | 243.7969  | 286.9285  |
| 343.9963  | 436.4000  | 470.1175  |
| 543.2039  | 586.9917  | 676.5857  |
| 726.2621  | 814.9424  | 824.9224  |
| 857.8817  | 888.9744  | 895.2186  |
| 941.9873  | 1010.9632 | 1049.3561 |
| 1053.8358 | 1069.1301 | 1111.9512 |
| 1151.3711 | 1177.8885 | 1214.6866 |
| 1256.1923 | 1274.2404 | 1299.9755 |
| 1356.0260 | 1361.3957 | 1374.0165 |
| 1384.6230 | 1415.1044 | 1469.9438 |
| 1486.0867 | 1495.9006 | 1503.6050 |
| 1511.2601 | 1869.2498 | 3003.1080 |
| 3010.4643 | 3021.0019 | 3029.8270 |
| 3055.2037 | 3062.9149 | 3066.5801 |
| 3069.7387 | 3141.0120 | 3187.9661 |

Zero-point correction (Hartree): 0.158284

TS<sup>add</sup>(b)

-----

E(RB+HF-LYP/6-311++G(d,p)) (Hartree): -419.383758004

Electronic state : 1-A

Cartesian coordinates (Angs):

|   |           |           |           |
|---|-----------|-----------|-----------|
| C | -0.193964 | -0.598005 | 0.989681  |
| C | 0.828430  | -1.501207 | 0.350527  |
| C | 1.604665  | -0.806699 | -0.772951 |
| C | 2.117518  | 0.555609  | -0.292227 |
| C | 0.956195  | 1.494264  | 0.076259  |
| C | -0.162764 | 0.796385  | 0.847093  |
| O | -1.850608 | -1.042442 | -0.259643 |
| N | -2.167595 | 0.108967  | -0.584644 |
| N | -1.743251 | 1.174250  | -0.323617 |

Supplementary Material for PCCP

This journal is © The Owner Societies 2007

|                                           |           |           |           |                               |
|-------------------------------------------|-----------|-----------|-----------|-------------------------------|
| H                                         | -0.750609 | -1.012207 | 1.822468  |                               |
| H                                         | 0.350914  | -2.418660 | -0.001827 |                               |
| H                                         | 1.529883  | -1.808746 | 1.140215  |                               |
| H                                         | 2.435885  | -1.440750 | -1.094466 |                               |
| H                                         | 0.953539  | -0.674228 | -1.644938 |                               |
| H                                         | 2.741252  | 1.028044  | -1.056369 |                               |
| H                                         | 2.759256  | 0.400538  | 0.583934  |                               |
| H                                         | 1.328470  | 2.327649  | 0.679480  |                               |
| H                                         | 0.546412  | 1.944325  | -0.833403 |                               |
| H                                         | -0.614692 | 1.368972  | 1.649571  |                               |
| Rotational constants (GHz):               |           |           |           | 2.6524600 1.4612300 1.1648300 |
| Vibrational harmonic frequencies (cm-1):  |           |           |           |                               |
| -461.4395                                 | 69.9564   | 87.7521   |           |                               |
| 214.7590                                  | 247.1029  | 293.1003  |           |                               |
| 334.1321                                  | 440.6709  | 469.2964  |           |                               |
| 535.2339                                  | 587.9465  | 684.8092  |           |                               |
| 722.1441                                  | 810.8985  | 821.8168  |           |                               |
| 862.8552                                  | 885.4127  | 897.4990  |           |                               |
| 943.6845                                  | 1008.8409 | 1048.2994 |           |                               |
| 1052.4638                                 | 1068.4679 | 1108.8668 |           |                               |
| 1154.0049                                 | 1181.7561 | 1215.0354 |           |                               |
| 1251.8652                                 | 1276.8975 | 1298.6735 |           |                               |
| 1354.9008                                 | 1367.6190 | 1373.2222 |           |                               |
| 1384.4933                                 | 1413.2282 | 1462.7850 |           |                               |
| 1485.5131                                 | 1498.4253 | 1505.2860 |           |                               |
| 1510.9898                                 | 1872.6763 | 2984.3150 |           |                               |
| 3007.8109                                 | 3022.9229 | 3028.8541 |           |                               |
| 3056.1539                                 | 3064.5644 | 3067.4649 |           |                               |
| 3071.1242                                 | 3152.6024 | 3177.2086 |           |                               |
| Zero-point correction (Hartree): 0.158188 |           |           |           |                               |

OD

-----

E(RB+HF-LYP/6-311++G(d,p)) (Hartree): -419.434688747

Electronic state : 1-A

Cartesian coordinates (Angs):

|   |           |           |           |
|---|-----------|-----------|-----------|
| C | -0.360315 | -0.820228 | 0.605585  |
| C | -0.493716 | 0.704319  | 0.679321  |
| C | 1.040290  | -1.402526 | 0.410384  |
| C | 0.514628  | 1.482850  | -0.178843 |
| C | 1.925797  | -0.571368 | -0.524886 |
| C | 1.932432  | 0.901954  | -0.099274 |
| H | -0.821326 | -1.283309 | 1.487065  |
| H | -0.504029 | 1.053711  | 1.712032  |



Supplementary Material for PCCP  
This journal is © The Owner Societies 2007

|   |           |           |           |
|---|-----------|-----------|-----------|
| H | 0.940828  | -2.431714 | 0.054986  |
| H | 1.517923  | -1.457362 | 1.395369  |
| H | 0.496038  | 2.535604  | 0.114494  |
| H | 0.174073  | 1.441703  | -1.218643 |
| H | 2.940445  | -0.980302 | -0.521043 |
| H | 1.559444  | -0.650400 | -1.555243 |
| H | 2.601554  | 1.484109  | -0.739231 |
| H | 2.324923  | 0.989675  | 0.922353  |
| N | -1.312166 | -1.144020 | -0.500148 |
| O | -1.830599 | 0.900891  | 0.159103  |
| N | -2.107802 | -0.238672 | -0.682521 |

Rotational constants (GHz): 2.9254500 1.6010200 1.2304300

Vibrational harmonic frequencies (cm<sup>-1</sup>):

|           |           |           |
|-----------|-----------|-----------|
| 135.6372  | 136.6643  | 290.2314  |
| 332.3730  | 367.9315  | 418.6639  |
| 478.3429  | 525.1426  | 616.8100  |
| 620.8910  | 739.1093  | 782.1383  |
| 789.8608  | 858.5172  | 861.8992  |
| 915.6432  | 939.5913  | 941.3313  |
| 988.9929  | 1019.2941 | 1053.7013 |
| 1076.6159 | 1119.9353 | 1125.9234 |
| 1167.0833 | 1205.0171 | 1259.1988 |
| 1270.7749 | 1300.9260 | 1324.6062 |
| 1342.7488 | 1354.1181 | 1367.6965 |
| 1379.1435 | 1389.6367 | 1395.8435 |
| 1479.6164 | 1491.2955 | 1495.7842 |
| 1504.7043 | 1657.4603 | 3003.0348 |
| 3011.6431 | 3020.1590 | 3027.9952 |
| 3036.3157 | 3062.9893 | 3064.2763 |
| 3074.4373 | 3075.5331 | 3100.0150 |

Zero-point correction (Hartree): 0.161744

TS<sup>H-shift</sup>

-----

E(RB+HF-LYP/6-311++G(d,p)) (Hartree): -419.408592465

Electronic state : 1-A

Cartesian coordinates (Angs):

|   |           |           |           |
|---|-----------|-----------|-----------|
| C | -0.482290 | 0.774505  | 0.597027  |
| C | -0.260713 | -0.695602 | 0.790970  |
| O | -1.743877 | 1.151571  | 0.523909  |
| N | -1.445561 | -1.223453 | -0.636176 |
| N | -2.247896 | -0.468988 | -0.862004 |
| H | -0.102252 | 0.959923  | 1.657335  |
| C | 0.502572  | 1.425430  | -0.396368 |
| H | 0.094434  | 1.267046  | -1.400385 |

Supplementary Material for PCCP  
This journal is © The Owner Societies 2007

|   |           |           |           |
|---|-----------|-----------|-----------|
| H | 0.486140  | 2.504019  | -0.223518 |
| C | 1.086521  | -1.333050 | 0.620262  |
| H | 1.599598  | -1.285731 | 1.591036  |
| H | 0.941330  | -2.400619 | 0.426073  |
| C | 1.935823  | -0.661055 | -0.466854 |
| H | 1.534911  | -0.926151 | -1.451692 |
| H | 2.955555  | -1.054017 | -0.425947 |
| C | 1.929439  | 0.865180  | -0.310110 |
| H | 2.555239  | 1.323779  | -1.081366 |
| H | 2.382731  | 1.135475  | 0.652853  |
| H | -0.910583 | -1.141650 | 1.542040  |

Rotational constants (GHz): 2.5629800 1.4767200 1.1827700

Vibrational harmonic frequencies (cm-1):

|           |           |           |
|-----------|-----------|-----------|
| -401.2039 | 115.1483  | 155.3213  |
| 237.1234  | 258.9053  | 297.7965  |
| 351.6466  | 404.6238  | 418.1566  |
| 475.8857  | 519.8585  | 602.3309  |
| 624.7542  | 710.9262  | 804.7301  |
| 829.0156  | 866.0874  | 908.5204  |
| 945.6753  | 985.5073  | 1032.1421 |
| 1044.8641 | 1062.7695 | 1082.3138 |
| 1127.4673 | 1159.4553 | 1195.6412 |
| 1221.5647 | 1264.2329 | 1284.2269 |
| 1296.0321 | 1332.6290 | 1366.6864 |
| 1374.1196 | 1380.7440 | 1388.7309 |
| 1452.2703 | 1485.1515 | 1493.7071 |
| 1502.4088 | 2153.2023 | 2625.8712 |
| 3000.7135 | 3001.3574 | 3025.2764 |
| 3036.1972 | 3056.6293 | 3060.7745 |
| 3069.5894 | 3085.6671 | 3138.0875 |

Zero-point correction (Hartree): 0.155627

TS<sup>diazo</sup>

-----  
E(RB+HF-LYP/6-311++G(d,p)) (Hartree): -419.404995900

Electronic state : 1-A

Cartesian coordinates (Angs):

|   |           |           |           |
|---|-----------|-----------|-----------|
| C | -0.371800 | -0.879511 | 0.686007  |
| C | -0.567098 | 1.014951  | 0.614563  |
| C | 1.049956  | -1.403122 | 0.554291  |
| C | 0.521616  | 1.499499  | -0.356296 |
| C | 1.890519  | -0.646632 | -0.480094 |
| C | 1.907403  | 0.862017  | -0.205631 |
| H | -0.866917 | -1.181325 | 1.611182  |

Supplementary Material for PCCP  
This journal is © The Owner Societies 2007

|   |           |           |           |
|---|-----------|-----------|-----------|
| H | -0.272149 | 1.104953  | 1.683318  |
| H | 1.049444  | -2.480377 | 0.357019  |
| H | 1.503730  | -1.278678 | 1.543019  |
| H | 0.588020  | 2.584837  | -0.219057 |
| H | 0.141650  | 1.348040  | -1.373026 |
| H | 2.907945  | -1.049598 | -0.463746 |
| H | 1.501576  | -0.831781 | -1.489352 |
| H | 2.605081  | 1.351309  | -0.892250 |
| H | 2.298382  | 1.042269  | 0.804668  |
| N | -1.278173 | -1.175549 | -0.338245 |
| O | -1.775004 | 1.264954  | 0.318682  |
| N | -2.127584 | -0.740523 | -0.945793 |

Rotational constants (GHz): 2.3974600 1.5800000 1.1630600

Vibrational harmonic frequencies (cm-1):

|           |           |           |
|-----------|-----------|-----------|
| -404.5561 | 91.1213   | 145.3608  |
| 206.5661  | 263.9862  | 329.0703  |
| 351.7020  | 367.4633  | 450.6983  |
| 490.1083  | 556.4278  | 603.2463  |
| 609.5790  | 753.3085  | 812.2989  |
| 854.6202  | 867.0537  | 902.5969  |
| 941.1957  | 994.4167  | 1011.4598 |
| 1077.1383 | 1099.6894 | 1114.8623 |
| 1139.8956 | 1197.0720 | 1201.9374 |
| 1269.2730 | 1287.2231 | 1304.9661 |
| 1340.8789 | 1352.5962 | 1372.5665 |
| 1382.7841 | 1388.9003 | 1465.9735 |
| 1473.5899 | 1477.4637 | 1495.8768 |
| 1501.2375 | 2136.1397 | 2829.1874 |
| 3000.3196 | 3012.1028 | 3019.9433 |
| 3025.8848 | 3051.7291 | 3056.0451 |
| 3057.8774 | 3065.0983 | 3096.3575 |

Zero-point correction (Hartree): 0.156959

diazo

-----

E(RB+HF-LYP/6-311++G(d,p)) (Hartree): -419.435051682

Electronic state : 1-A

Cartesian coordinates (Angs):

|   |           |           |           |
|---|-----------|-----------|-----------|
| C | 2.715116  | 0.723791  | 0.202419  |
| C | -3.567828 | -0.448328 | -0.226465 |
| C | 1.397095  | 0.598848  | -0.518409 |
| C | -2.283344 | -0.295668 | 0.549333  |
| C | 0.226343  | 0.175962  | 0.389024  |
| C | -1.108450 | 0.105453  | -0.361395 |
| H | 2.942507  | 1.527334  | 0.889545  |

Supplementary Material for PCCP  
This journal is © The Owner Societies 2007

|   |           |           |           |
|---|-----------|-----------|-----------|
| H | -3.529591 | -1.191788 | -1.054596 |
| H | 1.504223  | -0.118103 | -1.338936 |
| H | 1.160494  | 1.562813  | -0.984517 |
| H | -2.062402 | -1.267131 | 1.012919  |
| H | -2.438136 | 0.434704  | 1.347213  |
| H | 0.452173  | -0.798675 | 0.836179  |
| H | 0.142234  | 0.884921  | 1.220614  |
| H | -1.024102 | -0.611846 | -1.187243 |
| H | -1.324272 | 1.078667  | -0.817403 |
| N | 3.636822  | -0.174572 | 0.069180  |
| O | -4.582168 | 0.169485  | -0.015324 |
| N | 4.443267  | -0.970732 | -0.070355 |

Rotational constants (GHz): 8.0334900 0.4206000 0.4149700

Vibrational harmonic frequencies (cm-1):

|           |           |           |
|-----------|-----------|-----------|
| 29.2739   | 41.5819   | 55.5023   |
| 116.4578  | 123.1117  | 133.0256  |
| 237.4880  | 264.4371  | 330.3782  |
| 400.4792  | 507.2920  | 524.5005  |
| 537.9696  | 598.9283  | 735.6843  |
| 778.2484  | 830.7088  | 935.0857  |
| 968.7381  | 998.3908  | 1022.4459 |
| 1047.1624 | 1096.1555 | 1141.5916 |
| 1184.2604 | 1216.0548 | 1245.5446 |
| 1271.3383 | 1307.3087 | 1328.4654 |
| 1335.0397 | 1368.6664 | 1392.8256 |
| 1417.0934 | 1436.4535 | 1467.2804 |
| 1477.7201 | 1490.1237 | 1507.0226 |
| 1801.7984 | 2157.8350 | 2857.6510 |
| 3001.9498 | 3007.5150 | 3009.4855 |
| 3021.3048 | 3033.0986 | 3049.2303 |
| 3069.2749 | 3089.1310 | 3203.1928 |

Zero-point correction (Hartree): 0.155374

### III. Methylcyclohexene

TS<sup>Me-Shift</sup>

-----

E(RB+HF-LYP/6-311++G(d,p)) (Hartree): -458.729702301

Electronic state : 1-A

Cartesian coordinates (Angs):

|   |           |           |           |
|---|-----------|-----------|-----------|
| C | -0.231316 | -0.328775 | 0.962008  |
| C | -0.492900 | 0.767745  | -0.019403 |
| C | 1.119496  | -0.927755 | 1.163910  |
| N | -1.400607 | -1.671621 | 0.015899  |

|   |           |           |           |
|---|-----------|-----------|-----------|
| C | 0.448498  | 0.689252  | -1.252073 |
| O | -1.768292 | 0.975442  | -0.302839 |
| C | 1.920800  | -1.053488 | -0.139952 |
| C | 1.889527  | 0.251111  | -0.946387 |
| N | -2.209594 | -1.189416 | -0.590313 |
| H | -0.909726 | -0.346068 | 1.812112  |
| H | 1.010305  | -1.889621 | 1.674442  |
| H | 1.652931  | -0.282475 | 1.880776  |
| H | 0.426448  | 1.662780  | -1.748195 |
| H | -0.013792 | -0.018664 | -1.946997 |
| H | 2.949565  | -1.344405 | 0.090552  |
| H | 1.490725  | -1.863396 | -0.739659 |
| H | 2.438111  | 0.118278  | -1.884069 |
| H | 2.419763  | 1.036307  | -0.394141 |
| C | -0.023460 | 1.985955  | 0.948268  |
| H | -0.691845 | 2.063303  | 1.804802  |
| H | 1.015574  | 1.916769  | 1.274144  |
| H | -0.154175 | 2.866645  | 0.321609  |

Rotational constants (GHz): 1.7487900 1.3205100 1.0718700

Vibrational harmonic frequencies (cm-1):

|           |           |           |
|-----------|-----------|-----------|
| -318.7948 | 122.4425  | 149.4708  |
| 207.4013  | 224.7202  | 246.3030  |
| 252.7164  | 316.0298  | 345.6255  |
| 372.4015  | 422.4714  | 455.9612  |
| 477.5508  | 489.5579  | 533.9919  |
| 615.2573  | 701.2413  | 754.2579  |
| 812.2183  | 846.3911  | 892.1104  |
| 909.4066  | 974.3755  | 979.9925  |
| 1011.4727 | 1016.9264 | 1039.1287 |
| 1078.2936 | 1108.0167 | 1155.2319 |
| 1161.1681 | 1206.0549 | 1257.4224 |
| 1265.0094 | 1290.7835 | 1330.0887 |
| 1356.7044 | 1365.2356 | 1369.1530 |
| 1385.3061 | 1390.8949 | 1446.2100 |
| 1473.5688 | 1483.9146 | 1490.7060 |
| 1498.0563 | 1506.8203 | 2185.7400 |
| 2969.7184 | 3016.2033 | 3025.7367 |
| 3039.8737 | 3045.8315 | 3056.7187 |
| 3059.1695 | 3069.3942 | 3084.1435 |
| 3133.2738 | 3145.3147 | 3151.3650 |

Zero-point correction (Hartree): 0.184009

TS<sup>alkyl-shift</sup>

-----

E(RB+HF-LYP/6-311++G(d,p)) (Hartree): -458.730539212

Electronic state : 1-A

Cartesian coordinates (Angs):

|   |           |           |           |
|---|-----------|-----------|-----------|
| C | -0.425080 | 0.754411  | 0.027039  |
| C | 1.118381  | 1.344563  | -0.072551 |
| C | 2.163243  | 0.417557  | 0.528586  |
| C | 2.188697  | -0.918353 | -0.214611 |
| C | 0.761375  | -1.525202 | -0.222176 |
| C | -0.177797 | -0.495720 | -0.768991 |
| O | -0.743079 | 0.530963  | 1.287581  |
| N | -2.275467 | -1.025580 | 0.664902  |
| N | -1.866719 | -1.317410 | -0.339116 |
| H | 1.029473  | 2.277497  | 0.484491  |
| H | 1.353561  | 1.591806  | -1.112135 |
| H | 3.145202  | 0.900553  | 0.472493  |
| H | 1.933907  | 0.256533  | 1.584835  |
| H | 2.872422  | -1.632111 | 0.253189  |
| H | 2.537334  | -0.769150 | -1.243816 |
| H | 0.732780  | -2.433716 | -0.827785 |
| H | 0.477215  | -1.766751 | 0.803658  |
| H | -0.192332 | -0.402008 | -1.855546 |
| C | -1.335168 | 1.766592  | -0.702496 |
| H | -2.364784 | 1.403338  | -0.700545 |
| H | -1.317513 | 2.708829  | -0.151820 |
| H | -1.029242 | 1.955311  | -1.736970 |

Rotational constants (GHz): 2.0039100 1.2748100 0.9777300

Vibrational harmonic frequencies (cm-1):

|           |           |           |
|-----------|-----------|-----------|
| -369.3305 | 134.4793  | 153.7632  |
| 187.5031  | 197.8931  | 244.8691  |
| 267.0244  | 296.1374  | 326.6531  |
| 345.1290  | 423.6817  | 437.8616  |
| 480.8456  | 518.7467  | 565.3947  |
| 577.1166  | 698.9131  | 761.4496  |
| 856.3757  | 862.9731  | 884.4557  |
| 931.9486  | 939.5572  | 983.5299  |
| 1010.5177 | 1029.5548 | 1050.9761 |
| 1071.0056 | 1097.3871 | 1126.4122 |
| 1167.4102 | 1192.5010 | 1241.1457 |
| 1262.5056 | 1290.8279 | 1310.4386 |
| 1342.4879 | 1359.4250 | 1380.7810 |
| 1391.2973 | 1403.7616 | 1473.6220 |
| 1477.2915 | 1485.5988 | 1488.6872 |
| 1492.4264 | 1501.7350 | 2161.6361 |
| 3013.3232 | 3021.7237 | 3029.3355 |
| 3041.0506 | 3054.5426 | 3068.5524 |
| 3084.9143 | 3095.1036 | 3104.3392 |

3109.2953            3115.4927            3122.6481  
Zero-point correction (Hartree): 0.183953

TS<sup>diazo</sup>

-----

E(UB+HF-LYP/6-311++G(d,p)) (Hartree): -458.731259327

Electronic state : 1-A

Cartesian coordinates (Angs):

|   |           |           |           |
|---|-----------|-----------|-----------|
| C | -0.261575 | -0.787203 | 0.822437  |
| C | -0.680588 | 0.883766  | -0.017369 |
| C | 1.216525  | -1.120780 | 0.959552  |
| C | 0.455122  | 1.077805  | -1.053260 |
| C | 2.046081  | -0.755082 | -0.275048 |
| C | 1.890510  | 0.724492  | -0.643525 |
| H | -0.787426 | -0.771442 | 1.779906  |
| H | 1.350045  | -2.173118 | 1.231933  |
| H | 1.574662  | -0.542354 | 1.817309  |
| H | 0.403263  | 2.128243  | -1.363377 |
| H | 0.169200  | 0.492297  | -1.933493 |
| H | 3.095865  | -0.990744 | -0.074121 |
| H | 1.747012  | -1.379287 | -1.126595 |
| H | 2.563703  | 0.965003  | -1.472763 |
| H | 2.216057  | 1.345598  | 0.200341  |
| N | -1.033035 | -1.603361 | -0.014902 |
| O | -1.846469 | 0.752304  | -0.525186 |
| N | -1.867524 | -1.552339 | -0.777906 |
| C | -0.585431 | 1.791609  | 1.228180  |
| H | -0.698879 | 2.827029  | 0.893619  |
| H | -1.407517 | 1.569931  | 1.910807  |
| H | 0.365814  | 1.712665  | 1.761785  |

Rotational constants (GHz): 1.6891800 1.3734200 1.0542600

Vibrational harmonic frequencies (cm-1):

|           |           |           |
|-----------|-----------|-----------|
| -414.0095 | 89.2641   | 142.8398  |
| 199.8357  | 230.5062  | 243.2818  |
| 298.2629  | 310.7128  | 345.0264  |
| 369.2760  | 440.6695  | 470.9268  |
| 513.0836  | 533.0781  | 579.9346  |
| 608.5826  | 722.0467  | 809.8114  |
| 819.1915  | 865.8705  | 884.5312  |
| 913.0417  | 969.7116  | 974.1110  |
| 1016.2584 | 1049.2731 | 1059.8905 |
| 1104.8006 | 1132.2948 | 1152.7868 |
| 1201.9794 | 1210.9906 | 1275.6481 |

Supplementary Material for PCCP

This journal is © The Owner Societies 2007

|           |           |           |
|-----------|-----------|-----------|
| 1289.2529 | 1340.8118 | 1351.3870 |
| 1372.4563 | 1382.0269 | 1387.1226 |
| 1392.3771 | 1417.3860 | 1473.8632 |
| 1478.3008 | 1482.9460 | 1494.2910 |
| 1499.6433 | 1501.1633 | 2131.8572 |
| 3006.0422 | 3011.9052 | 3017.9329 |
| 3025.4089 | 3027.2453 | 3047.7725 |
| 3054.4726 | 3059.7179 | 3065.5014 |
| 3087.2249 | 3088.6610 | 3112.7547 |

Zero-point correction (Hartree): 0.184844

diazo

-----

E(UB+HF-LYP/6-311++G(d,p)) (Hartree): -458.771968955

Electronic state : 1-A

Cartesian coordinates (Angs):

|   |           |           |           |
|---|-----------|-----------|-----------|
| C | 3.200610  | -0.002294 | 0.705293  |
| C | -3.182514 | 0.088969  | -0.162241 |
| C | 1.877961  | 0.656947  | 0.406252  |
| N | 4.084721  | -0.181320 | -0.221867 |
| C | -1.834808 | -0.571677 | 0.099259  |
| O | -3.284867 | 1.275597  | -0.385930 |
| C | 0.684597  | -0.316515 | 0.380607  |
| C | -0.650222 | 0.392564  | 0.127990  |
| N | 4.857333  | -0.321182 | -1.051419 |
| H | 3.462927  | -0.391059 | 1.679928  |
| H | 1.946342  | 1.178367  | -0.553787 |
| H | 1.693258  | 1.431532  | 1.160323  |
| H | -1.691831 | -1.340342 | -0.672663 |
| H | -1.911208 | -1.129767 | 1.042148  |
| H | 0.860210  | -1.073722 | -0.392544 |
| H | 0.643988  | -0.856649 | 1.334580  |
| H | -0.610373 | 0.938521  | -0.819904 |
| H | -0.822133 | 1.150487  | 0.899388  |
| C | -4.396610 | -0.820644 | -0.120595 |
| H | -5.281986 | -0.274180 | -0.443037 |
| H | -4.248812 | -1.700027 | -0.754321 |
| H | -4.549905 | -1.184521 | 0.900936  |

Rotational constants (GHz): 4.8981300 0.3507700 0.3452300

Vibrational harmonic frequencies (cm-1):

|          |          |          |
|----------|----------|----------|
| 15.1188  | 29.4038  | 42.5312  |
| 84.7819  | 91.2674  | 116.1929 |
| 129.5365 | 212.7194 | 231.0010 |
| 288.8785 | 368.8706 | 442.0626 |
| 476.2665 | 500.4428 | 536.9893 |



|           |           |           |
|-----------|-----------|-----------|
| 591.7443  | 607.4511  | 723.2293  |
| 760.4630  | 825.7388  | 860.5659  |
| 934.9645  | 962.5861  | 1000.0316 |
| 1020.1212 | 1051.8350 | 1085.8661 |
| 1129.1687 | 1173.3981 | 1175.2607 |
| 1215.9692 | 1258.4277 | 1272.9805 |
| 1322.6796 | 1328.3218 | 1334.5228 |
| 1378.8951 | 1387.8584 | 1400.2448 |
| 1436.3344 | 1452.8220 | 1467.3360 |
| 1477.0647 | 1478.5635 | 1488.6569 |
| 1505.8639 | 1781.7236 | 2156.2197 |
| 3000.7260 | 3005.4141 | 3012.3566 |
| 3023.2250 | 3029.2119 | 3031.4718 |
| 3035.6401 | 3060.7977 | 3074.6901 |
| 3085.2540 | 3138.3987 | 3201.1092 |

Zero-point correction (Hartree): 0.182963

#### IV. 1-Hexene

TS<sup>addNterm</sup>

-----

E(RB+HF-LYP/6-311++G(d,p)) (Hartree): -420.593297174

Electronic state : 1-A

Cartesian coordinates (Angs):

|   |           |           |           |
|---|-----------|-----------|-----------|
| C | -2.167010 | 1.267740  | 0.082975  |
| C | -0.941137 | 0.836250  | 0.580426  |
| C | 0.342244  | 0.949715  | -0.195845 |
| N | -3.103436 | -0.373040 | -0.553481 |
| N | -2.384077 | -1.237006 | -0.214707 |
| O | -1.297184 | -1.299345 | 0.367453  |
| H | -2.953939 | 1.540931  | 0.775247  |
| H | -0.845626 | 0.685812  | 1.651097  |
| H | 0.662744  | 2.000984  | -0.134355 |
| H | 0.146654  | 0.760285  | -1.257418 |
| H | -2.201928 | 1.761498  | -0.882046 |
| C | 1.485731  | 0.059219  | 0.303376  |
| H | 1.651875  | 0.252308  | 1.371082  |
| H | 1.184286  | -0.989347 | 0.222550  |
| C | 2.795773  | 0.282610  | -0.459742 |
| H | 3.090687  | 1.336154  | -0.377625 |
| H | 2.627685  | 0.096061  | -1.527487 |
| C | 3.938842  | -0.606689 | 0.037691  |
| H | 4.858423  | -0.426105 | -0.525570 |
| H | 4.154346  | -0.419685 | 1.094422  |

Supplementary Material for PCCP  
This journal is © The Owner Societies 2007

H 3.688200 -1.666885 -0.065500  
Rotational constants (GHz): 3.6767000 0.6903800 0.6197100

Vibrational harmonic frequencies (cm-1):

|           |           |           |
|-----------|-----------|-----------|
| -449.9298 | 52.8122   | 65.4185   |
| 95.6879   | 125.3464  | 146.7921  |
| 197.8443  | 246.6782  | 266.6912  |
| 331.0920  | 392.0054  | 472.3046  |
| 497.5921  | 575.3781  | 719.5253  |
| 730.7537  | 764.3789  | 830.9252  |
| 898.8541  | 911.2773  | 942.3453  |
| 1004.7228 | 1023.2475 | 1036.4359 |
| 1066.4618 | 1072.5382 | 1122.8249 |
| 1189.5867 | 1221.2382 | 1244.1126 |
| 1277.9661 | 1284.2639 | 1314.1465 |
| 1334.3348 | 1352.7851 | 1399.3574 |
| 1414.4425 | 1445.8419 | 1466.6293 |
| 1489.4539 | 1498.6192 | 1500.3670 |
| 1511.8619 | 1544.4442 | 1889.8459 |
| 2977.0374 | 3001.2148 | 3006.8412 |
| 3019.8725 | 3028.1337 | 3038.6404 |
| 3069.4339 | 3081.8637 | 3085.9083 |
| 3133.0928 | 3160.3302 | 3220.2177 |

Zero-point correction (Hartree): 0.177223

OD<sup>Nterm</sup>

-----  
E(RB+HF-LYP/6-311++G(d,p)) (Hartree): -420.643470370

Electronic state : 1-A

Cartesian coordinates (Angs):

|   |           |           |           |
|---|-----------|-----------|-----------|
| C | -2.253795 | 1.042129  | 0.131249  |
| C | -0.981334 | 0.332057  | 0.613003  |
| C | 0.288330  | 0.717933  | -0.140653 |
| C | 1.534182  | -0.046511 | 0.316772  |
| C | 2.797173  | 0.338584  | -0.461624 |
| C | 4.043265  | -0.421011 | 0.002022  |
| H | -2.881079 | 1.433511  | 0.935772  |
| H | -2.069354 | 1.848742  | -0.581072 |
| H | -0.839878 | 0.432531  | 1.691426  |
| H | 0.444552  | 1.796472  | -0.006527 |
| H | 0.119378  | 0.555425  | -1.212254 |
| H | 1.697691  | 0.137701  | 1.386815  |
| H | 1.351846  | -1.121102 | 0.213532  |
| H | 2.969725  | 1.417725  | -0.364858 |
| H | 2.632211  | 0.151357  | -1.529544 |
| H | 4.925357  | -0.129077 | -0.574282 |

Supplementary Material for PCCP

This journal is © The Owner Societies 2007

|   |           |           |           |
|---|-----------|-----------|-----------|
| H | 4.256521  | -0.225171 | 1.057638  |
| H | 3.912786  | -1.501331 | -0.113671 |
| N | -3.018990 | -0.027138 | -0.549250 |
| N | -2.501237 | -1.122342 | -0.398351 |
| O | -1.305637 | -1.066189 | 0.370703  |

Rotational constants (GHz): 4.8901000 0.6705700 0.6323000

Vibrational harmonic frequencies (cm-1):

|           |           |           |
|-----------|-----------|-----------|
| 50.0101   | 65.6593   | 89.0256   |
| 119.3188  | 146.3515  | 241.7283  |
| 276.1147  | 297.7268  | 433.5343  |
| 457.0795  | 541.8146  | 672.8838  |
| 733.9292  | 756.3851  | 810.0085  |
| 844.2540  | 886.5133  | 905.2463  |
| 913.1899  | 964.0941  | 975.8230  |
| 1016.9475 | 1042.6766 | 1066.2282 |
| 1077.0220 | 1130.2930 | 1150.9992 |
| 1209.2470 | 1244.5042 | 1272.2403 |
| 1305.5457 | 1310.3358 | 1322.0843 |
| 1337.0020 | 1355.7629 | 1396.2749 |
| 1407.0638 | 1415.2918 | 1475.1965 |
| 1482.7501 | 1490.1223 | 1499.2025 |
| 1499.5495 | 1512.0466 | 1662.2459 |
| 2999.6007 | 3000.6742 | 3007.4240 |
| 3019.4476 | 3028.3939 | 3034.9822 |
| 3057.9669 | 3062.2249 | 3071.6028 |
| 3081.0051 | 3085.8372 | 3101.8043 |

Zero-point correction (Hartree): 0.180915

TSaddOterm

-----

E(RB+HF-LYP/6-311++G(d,p)) (Hartree): -420.589774252

Electronic state : 1-A

Cartesian coordinates (Angs):

|   |           |           |           |
|---|-----------|-----------|-----------|
| C | -1.541610 | 0.045980  | 0.315373  |
| C | -0.365691 | 0.860509  | -0.236246 |
| C | 0.914628  | 0.745815  | 0.571775  |
| C | 2.108685  | 1.306962  | 0.126750  |
| N | 1.315556  | -1.242687 | 0.384697  |
| N | 2.361329  | -1.249723 | -0.146785 |
| O | 3.159037  | -0.381256 | -0.517081 |
| H | -1.721280 | 0.338462  | 1.358270  |
| H | -1.274091 | -1.014502 | 0.335483  |
| H | -0.166804 | 0.575394  | -1.275782 |
| H | -0.654989 | 1.919571  | -0.262265 |

Supplementary Material for PCCP  
This journal is © The Owner Societies 2007

|   |           |           |           |
|---|-----------|-----------|-----------|
| H | 0.786882  | 0.657409  | 1.647256  |
| H | 2.891514  | 1.567131  | 0.826646  |
| H | 2.172335  | 1.765765  | -0.852667 |
| C | -2.831350 | 0.236868  | -0.490016 |
| H | -2.651513 | -0.052170 | -1.532731 |
| H | -3.093883 | 1.301899  | -0.510690 |
| C | -4.010443 | -0.567967 | 0.064130  |
| H | -4.237628 | -0.278217 | 1.094954  |
| H | -4.914374 | -0.412520 | -0.531130 |
| H | -3.791978 | -1.640301 | 0.063327  |

Rotational constants (GHz): 3.9042000 0.6624800 0.6035800

Vibrational harmonic frequencies (cm-1):

|           |           |           |
|-----------|-----------|-----------|
| -467.3796 | 43.1039   | 58.8934   |
| 93.8248   | 123.2588  | 141.8818  |
| 214.2454  | 242.2404  | 269.8220  |
| 328.6837  | 388.2469  | 470.3259  |
| 505.3532  | 584.6053  | 719.4725  |
| 730.8448  | 759.9595  | 814.6499  |
| 896.0440  | 908.6158  | 938.9047  |
| 999.7563  | 1025.3688 | 1037.0767 |
| 1064.6993 | 1071.6186 | 1126.3108 |
| 1178.3913 | 1220.6221 | 1245.2434 |
| 1277.3331 | 1282.5483 | 1316.6771 |
| 1334.4668 | 1354.4394 | 1399.0100 |
| 1413.5372 | 1438.7703 | 1479.9036 |
| 1489.4569 | 1499.3475 | 1499.7637 |
| 1512.6874 | 1541.6769 | 1895.2974 |
| 2996.8277 | 2999.8080 | 3005.9054 |
| 3019.2157 | 3027.6824 | 3037.1367 |
| 3069.2239 | 3081.0590 | 3085.1663 |
| 3139.6020 | 3149.7326 | 3240.5387 |

Zero-point correction (Hartree): 0.177216

OD<sup>Oterm</sup>

-----

E(RB+HF-LYP/6-311++G(d,p)) (Hartree): -420.641516554

Electronic state : 1-A

Cartesian coordinates (Angs):

|   |           |           |           |
|---|-----------|-----------|-----------|
| C | -1.581356 | -0.090881 | 0.287484  |
| C | -0.350171 | 0.699756  | -0.166628 |
| C | 0.954415  | 0.264733  | 0.504816  |
| C | 2.204596  | 1.063127  | 0.106494  |
| N | 1.326519  | -1.123562 | 0.111065  |
| N | 2.478503  | -1.208985 | -0.275194 |

Supplementary Material for PCCP  
This journal is © The Owner Societies 2007

|   |           |           |           |
|---|-----------|-----------|-----------|
| O | 3.162759  | 0.048304  | -0.253695 |
| C | -2.873006 | 0.364694  | -0.400844 |
| C | -4.105679 | -0.420005 | 0.057014  |
| H | -1.695209 | 0.011492  | 1.374515  |
| H | -1.417718 | -1.155982 | 0.094951  |
| H | -0.226881 | 0.616269  | -1.252811 |
| H | -0.496563 | 1.765227  | 0.048986  |
| H | 0.814134  | 0.235792  | 1.590912  |
| H | 2.621178  | 1.652344  | 0.923279  |
| H | 2.029826  | 1.703841  | -0.763067 |
| H | -2.758031 | 0.261876  | -1.486592 |
| H | -3.029098 | 1.433889  | -0.210989 |
| H | -4.268857 | -0.308635 | 1.133578  |
| H | -5.009112 | -0.074871 | -0.452872 |
| H | -3.993692 | -1.488386 | -0.151449 |

Rotational constants (GHz): 5.2072900 0.6444700 0.6007800

Vibrational harmonic frequencies (cm-1):

|           |           |           |
|-----------|-----------|-----------|
| 45.7228   | 61.3458   | 77.0399   |
| 118.2144  | 146.1027  | 239.0884  |
| 272.9903  | 291.0550  | 378.0410  |
| 455.0479  | 607.4015  | 636.3024  |
| 729.8530  | 741.7851  | 780.2299  |
| 831.0431  | 898.8560  | 924.0307  |
| 931.5361  | 977.4433  | 988.9812  |
| 1018.9435 | 1056.3373 | 1067.6654 |
| 1088.1543 | 1139.2519 | 1164.5233 |
| 1204.5587 | 1239.2086 | 1275.2612 |
| 1301.6227 | 1322.2951 | 1333.6382 |
| 1337.7078 | 1356.2313 | 1384.9040 |
| 1403.1661 | 1415.3868 | 1483.1416 |
| 1489.8913 | 1499.7972 | 1500.1305 |
| 1512.6354 | 1518.5937 | 1669.9694 |
| 3001.3109 | 3005.2370 | 3012.5837 |
| 3020.4800 | 3029.0507 | 3030.4382 |
| 3037.8056 | 3047.2210 | 3066.7197 |
| 3081.9708 | 3086.9029 | 3108.9816 |

Zero-point correction (Hartree): 0.180986

TS<sup>Nterm\_Hshift</sup>

-----  
E(RB+HF-LYP/6-311++G(d,p)) (Hartree): -420.607721452

Electronic state : 1-A

Cartesian coordinates (Angs):

|   |           |           |           |
|---|-----------|-----------|-----------|
| C | -2.182405 | 1.164474  | -0.007404 |
| C | -0.967412 | 0.489868  | 0.521787  |
| C | 0.246020  | 0.473269  | -0.427959 |
| C | 1.549966  | 0.143357  | 0.302442  |
| C | 2.749718  | -0.011828 | -0.638066 |
| C | 4.051878  | -0.336367 | 0.099871  |
| H | -3.000192 | 1.296679  | 0.695073  |
| H | -2.090484 | 1.942114  | -0.763354 |
| H | -0.867152 | 1.418279  | 1.209996  |
| H | 0.334559  | 1.437602  | -0.944704 |
| H | 0.051469  | -0.288349 | -1.192496 |
| H | 1.764189  | 0.932140  | 1.036148  |
| H | 1.400172  | -0.776875 | 0.875038  |
| H | 2.880746  | 0.908484  | -1.221165 |
| H | 2.535698  | -0.804535 | -1.365310 |
| H | 4.888402  | -0.447042 | -0.595691 |
| H | 4.312243  | 0.455372  | 0.809501  |
| H | 3.962318  | -1.269242 | 0.664808  |
| N | -2.954626 | -0.343187 | -0.811241 |
| N | -2.651117 | -1.321935 | -0.350880 |
| O | -1.202294 | -0.585676 | 1.227872  |

Rotational constants (GHz): 3.9628900 0.6488900 0.6397300

Vibrational harmonic frequencies (cm<sup>-1</sup>):

|           |           |           |
|-----------|-----------|-----------|
| -549.7523 | 51.1169   | 72.6114   |
| 98.8089   | 137.0496  | 177.7359  |
| 236.6516  | 247.2961  | 267.4128  |
| 305.3537  | 344.3132  | 442.8858  |
| 507.4846  | 512.6910  | 627.4737  |
| 725.0930  | 742.6696  | 802.3785  |
| 870.3189  | 884.3909  | 909.2020  |
| 954.6982  | 1000.3615 | 1026.9697 |
| 1058.2334 | 1067.6504 | 1112.0219 |
| 1135.0235 | 1162.1359 | 1194.0097 |
| 1245.0015 | 1285.8860 | 1314.8632 |
| 1331.9688 | 1358.8155 | 1367.8060 |
| 1399.6761 | 1413.6936 | 1453.6835 |
| 1474.1243 | 1489.1643 | 1499.7093 |
| 1500.2900 | 1512.3503 | 2159.6158 |
| 2485.2497 | 2995.7695 | 2999.7950 |
| 3004.7003 | 3019.2266 | 3027.3892 |
| 3042.8453 | 3069.6065 | 3081.1005 |
| 3084.7834 | 3111.7960 | 3215.2481 |

Zero-point correction (Hartree): 0.174549

TS<sup>Nterm\_diazo</sup>

-----  
E(RB+HF-LYP/6-311++G(d,p)) (Hartree): -420.611799691

Electronic state : 1-A

Cartesian coordinates (Angs):

|   |           |           |           |
|---|-----------|-----------|-----------|
| C | -2.286959 | 1.125812  | 0.256763  |
| C | -0.840736 | -0.049864 | 0.703338  |
| C | 0.341914  | 0.563814  | -0.059920 |
| C | 1.654970  | -0.150023 | 0.287587  |
| C | 2.869861  | 0.414787  | -0.456924 |
| C | 4.176210  | -0.304313 | -0.107154 |
| H | -2.814704 | 1.470891  | 1.144747  |
| H | -1.962157 | 1.944474  | -0.383571 |
| H | -0.840997 | 0.221638  | 1.779567  |
| H | 0.428690  | 1.632688  | 0.177282  |
| H | 0.149658  | 0.474622  | -1.135979 |
| H | 1.828356  | -0.081052 | 1.369642  |
| H | 1.540053  | -1.214955 | 0.061581  |
| H | 2.971041  | 1.484166  | -0.232751 |
| H | 2.693398  | 0.345676  | -1.537290 |
| H | 5.023746  | 0.117364  | -0.654836 |
| H | 4.397813  | -0.223742 | 0.961771  |
| H | 4.117865  | -1.369232 | -0.352254 |
| N | -3.069839 | 0.223385  | -0.442493 |
| N | -3.131005 | -0.866421 | -0.738535 |
| O | -1.202302 | -1.237820 | 0.415893  |

Rotational constants (GHz): 4.6811500 0.6046100 0.5787400

Vibrational harmonic frequencies (cm-1):

|           |           |           |
|-----------|-----------|-----------|
| -416.0424 | 42.9014   | 67.2823   |
| 91.9024   | 111.2643  | 144.9160  |
| 233.0621  | 242.6697  | 260.3534  |
| 299.0909  | 377.1172  | 427.4057  |
| 514.0181  | 559.9382  | 654.5103  |
| 690.2980  | 739.9703  | 806.2963  |
| 893.9165  | 916.9226  | 959.5052  |
| 982.8821  | 1016.6858 | 1058.9829 |
| 1070.7680 | 1103.4701 | 1130.3898 |
| 1155.0076 | 1175.6065 | 1238.4288 |
| 1272.5222 | 1313.0210 | 1323.3368 |
| 1335.5676 | 1356.7186 | 1391.3497 |
| 1413.3633 | 1456.8636 | 1461.6898 |
| 1470.7714 | 1487.7652 | 1497.7492 |
| 1499.6227 | 1510.8490 | 2159.6812 |
| 2852.5970 | 2991.9613 | 2998.4379 |
| 3004.6334 | 3018.6116 | 3026.3558 |
| 3037.3954 | 3064.1813 | 3080.3223 |
| 3083.3113 | 3096.2722 | 3175.1153 |

Zero-point correction (Hartree): 0.176206

TS<sup>Oterm\_Hshift</sup>

-----  
E(RB+HF-LYP/6-311++G(d,p)) (Hartree): -420.610867434

Electronic state : 1-A

Cartesian coordinates (Angs):

|   |           |           |           |
|---|-----------|-----------|-----------|
| C | 1.585918  | 0.047415  | 0.265689  |
| C | 0.415194  | -0.803902 | -0.250193 |
| C | -0.910743 | -0.450814 | 0.348023  |
| C | -2.202545 | -1.018262 | -0.131647 |
| N | -1.387776 | 1.394463  | -0.157638 |
| N | -2.494121 | 1.573847  | -0.210399 |
| O | -3.311106 | -0.423099 | 0.251506  |
| C | 2.933016  | -0.374102 | -0.331474 |
| C | 4.101258  | 0.477560  | 0.172566  |
| H | 1.632046  | -0.026805 | 1.358982  |
| H | 1.394671  | 1.099752  | 0.033548  |
| H | 0.351265  | -0.754872 | -1.342020 |
| H | 0.612463  | -1.856923 | -0.003135 |
| H | -0.907714 | -0.189833 | 1.406121  |
| H | -2.029884 | -1.962481 | 0.479517  |
| H | -2.131836 | -1.325537 | -1.195151 |
| H | 2.879043  | -0.309839 | -1.424710 |
| H | 3.120261  | -1.428958 | -0.096399 |
| H | 4.203523  | 0.406818  | 1.259808  |
| H | 5.046626  | 0.155035  | -0.271163 |
| H | 3.959067  | 1.532894  | -0.078976 |

Rotational constants (GHz): 4.0360800 0.6296600 0.5665800

Vibrational harmonic frequencies (cm-1):

|           |           |           |
|-----------|-----------|-----------|
| -379.2150 | 29.1025   | 63.2790   |
| 95.2497   | 119.4042  | 194.8568  |
| 221.1794  | 242.0270  | 280.4233  |
| 306.9576  | 314.8832  | 397.2207  |
| 457.8727  | 503.4743  | 580.4278  |
| 658.5219  | 732.8374  | 783.6879  |
| 898.7740  | 913.5304  | 1005.2144 |
| 1007.3693 | 1024.7338 | 1040.4751 |
| 1060.2484 | 1117.9718 | 1131.7635 |
| 1165.8228 | 1229.1267 | 1238.2041 |
| 1272.8718 | 1301.8587 | 1319.1288 |
| 1333.9531 | 1338.9856 | 1385.4395 |
| 1400.2514 | 1416.1768 | 1431.6717 |
| 1462.9742 | 1489.6966 | 1498.3021 |



Supplementary Material for PCCP  
This journal is © The Owner Societies 2007

|           |           |           |
|-----------|-----------|-----------|
| 1500.0509 | 1511.6842 | 2171.2500 |
| 2665.4794 | 2876.9647 | 2996.4496 |
| 3006.2352 | 3014.9627 | 3022.5129 |
| 3032.4229 | 3050.0113 | 3068.9913 |
| 3084.4264 | 3090.3117 | 3130.3400 |

Zero-point correction (Hartree): 0.174708

TS<sup>Oterm\_diazo</sup>

-----  
E(RB+HF-LYP/6-311++G(d,p)) (Hartree): -420.610468955

Electronic state : 1-A

Cartesian coordinates (Angs):

|   |           |           |           |
|---|-----------|-----------|-----------|
| C | 1.656832  | 0.135826  | 0.290230  |
| C | 0.365576  | -0.595610 | -0.106203 |
| C | -0.897519 | -0.115318 | 0.583707  |
| C | -2.460329 | -1.151027 | 0.079023  |
| N | -1.381574 | 1.111725  | 0.155143  |
| N | -2.269748 | 1.637406  | -0.308392 |
| O | -3.373052 | -0.381898 | -0.346257 |
| C | 2.902889  | -0.443317 | -0.389943 |
| C | 4.190701  | 0.290747  | -0.006225 |
| H | 1.780581  | 0.089883  | 1.379328  |
| H | 1.562457  | 1.198319  | 0.036160  |
| H | 0.216845  | -0.548363 | -1.190177 |
| H | 0.454076  | -1.658515 | 0.146037  |
| H | -0.833993 | -0.099091 | 1.672901  |
| H | -2.587329 | -1.629592 | 1.069255  |
| H | -1.934368 | -1.802442 | -0.646089 |
| H | 2.770406  | -0.405456 | -1.477699 |
| H | 2.995403  | -1.504843 | -0.130684 |
| H | 4.368995  | 0.241012  | 1.072404  |
| H | 5.059376  | -0.145092 | -0.506437 |
| H | 4.142330  | 1.347642  | -0.285741 |

Rotational constants (GHz): 4.2892900 0.6121300 0.5621000

Vibrational harmonic frequencies (cm-1):

|           |          |          |
|-----------|----------|----------|
| -369.2314 | 42.6231  | 71.1417  |
| 82.6679   | 108.4344 | 148.0499 |
| 197.0679  | 236.6567 | 252.5000 |
| 279.4381  | 371.9404 | 451.7749 |
| 531.8023  | 559.0604 | 597.2242 |
| 737.2430  | 789.1829 | 818.4464 |

Supplementary Material for PCCP

This journal is © The Owner Societies 2007

|           |           |           |
|-----------|-----------|-----------|
| 895.2897  | 917.2439  | 958.3277  |
| 1005.8107 | 1009.3265 | 1057.2724 |
| 1107.1664 | 1120.9064 | 1164.4136 |
| 1190.6979 | 1235.3234 | 1243.9148 |
| 1282.5955 | 1311.7414 | 1335.0223 |
| 1352.7266 | 1380.6164 | 1392.6613 |
| 1396.7037 | 1416.4986 | 1476.4192 |
| 1488.1705 | 1497.6378 | 1501.2460 |
| 1510.9715 | 1548.8147 | 2149.4759 |
| 2864.2257 | 2897.3375 | 3003.5926 |
| 3011.0433 | 3021.7330 | 3024.4386 |
| 3027.6121 | 3045.3606 | 3068.7350 |
| 3083.1180 | 3089.4826 | 3104.8853 |

Zero-point correction (Hartree): 0.176476
